# Supplementary material
Source: publisher figshare collection journal article supplement (https://frontiersin.figshare.com/ndownloader/files/20088488)
Supplement: Supplementary file [file 20088488]

Supplementary Figure 1

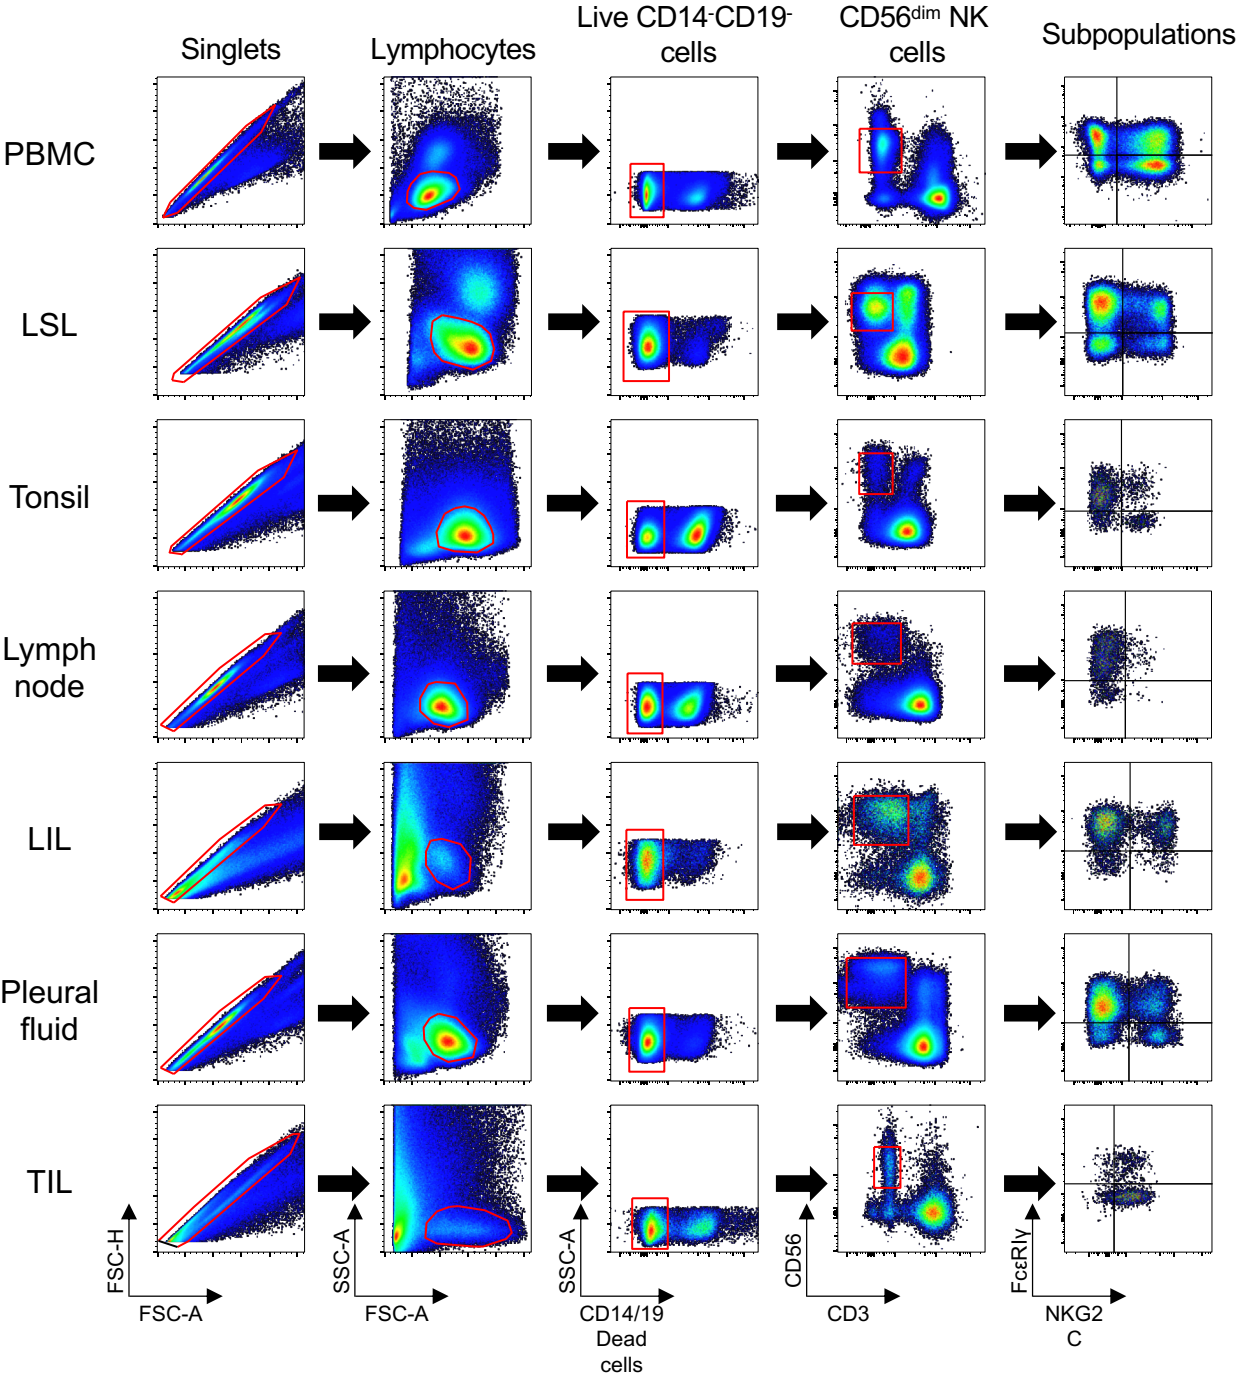

Supplementary Figure 1. Gating strategy of FcεRIγ<sup>+</sup>NKG2C<sup>-</sup>, FcεRIγ<sup>+</sup>NKG2C<sup>+</sup>, FcεRIγ<sup>-</sup>NKG2C<sup>+</sup>, or FcεRIγ<sup>-</sup>NKG2C<sup>-</sup> CD56<sup>dim</sup> NK cells in peripheral blood mononuclear cells (PBMCs), liver sinusoidal lymphocytes (LSLs), tonsils, lymph nodes, liver-infiltrating lymphocytes (LILs), pleural fluid, and tumor-infiltrating lymphocytes (TILs).
